# Supplementary material for: A Trichomonas vaginalis Rhomboid Protease and Its Substrate Modulate Parasite Attachment and Cytolysis of Host Cells
Source: PubMed Central journal article supplement (PMC4684317; doi:10.1371/journal.ppat.1005294), 2015-12-18
Supplement: ppat.1005294.s006.pdf [file ppat.1005294.s006.pdf]

**Fig. S5: Primers used in this study.**

**TvROM1 amplification primers**

Fwd 5'-CCGCGGATGTCGAATATTACAACCTTCAATG-3',

Rev 5'-GGATCCTTATTTCTTGTAAGATAATTGGAAG-3'

**TvROM2 amplification primers**

Fwd 5'-CCGCGGATGAGCGACGAAGTTGATAATG-3'

Rev 5'-GGATCCTTATCTAAATAACTTCTTGAAAAATTC-3'

**TvROM3 amplification primers**

Fwd 5'-CCGCGGATGCTTGCGTGGCTAGATG-3'

Rev 5'-GGATCCTTATTCAATAGTATGTGCAGTACCATG-3'

**Oligos for introduction of 2 HA-tags into 1x-HA MasterNeo**

2HANdeFwd 5'-TATGTACCCATACGATGTTCCAGATTACGCTTACCCATACG  
ATGTTCCAGATTACGCTCA-3'

2HA-NdeRev 5'-TATGAGCGTAATCTGGAACATCGTATGGGTAAGCGTAATC  
TGGAACATCGTATGGGTACA-3'

**TVAG\_166850 amplification primers**

Fwd 5'- CCGCGGATGTTACCACTATTTTACACA-3'

Rev 5'-GGATCCTTAAGCTGGGAAGATTCCTTCGAC-3'

**Primers used to introduce Ala672Phe and Gly673Phe mutations in TVAG\_166850**

Fwd 5'- ATTATCGGCTTAGCTTTCTTCGGTGGTGTGCGCC-3'

Rev 5'-GGCGGCAACACCACCGAAGAAAGCTAAGCCGATAAT-3'
